# Supplementary material for: Lung Cancer Screening in Greece: A Modelling Study to Estimate the Impact on Lung Cancer Life Years
Source: MDPI journal article supplement (doi:10.3390/cancers14225484), 2022-11-08
Supplement: s1 [file s1]

**Table S1.** Health state distribution

| Health state distribution   |         | Source                                                                            |
|-----------------------------|---------|-----------------------------------------------------------------------------------|
| Healthy                     | 0.99612 | Own calculation based on Globocan 2020 and Greek statistics on smoking population |
| Patient                     | 0.00388 |                                                                                   |
| NSCLC- Stage 0              | 1.00%   | Clinical expert opinion                                                           |
| NSCLC- Stage I              | 6.62%   | Clinical expert opinion                                                           |
| NSCLC- Stage II             | 10.86%  | Clinical expert opinion                                                           |
| NSCLC- Stage III operable   | 11.46%  | Clinical expert opinion                                                           |
| NSCLC- Stage III inoperable | 20.47%  | Clinical expert opinion                                                           |
| NSCLC- Stage IV             | 33.59%  | Clinical expert opinion                                                           |
| SCLC – limited stage        | 5.42%   | Clinical expert opinion                                                           |
| SCLC – extensive stage      | 10.58%  | Clinical expert opinion                                                           |

**Table S2.** Probability of random cancer-unrelated screening

|                                    |           |                                                                   |
|------------------------------------|-----------|-------------------------------------------------------------------|
|                                    |           |                                                                   |
| Total CTs in Greece                | 2,295,689 | Eurostat (online data codes: hlth_co_exam and hlth_rs_equip)      |
| Chest CTs % of total               | 17.00%    | Papadimitriou et al., 2003                                        |
| LC patients CTs per year (average) | 4         | Clinical expert opinion                                           |
| LC patients                        | 9,300     | Clinical expert opinion                                           |
| Cancer-unrelated CT probability    | 3.84%     | Own calculation (based on Greek population aged 15+, ELSTAT data) |

**Table S3.** Probability of developing symptoms by cancer type and stage

| Symptoms   | NSCLC   |          |           |          | SCLC    |           |
|------------|---------|----------|-----------|----------|---------|-----------|
|            | stage I | stage II | stage III | stage IV | Limited | Extensive |
| <b>No</b>  | 0.593   | 0.425    | 0.302     | 0.277    | 0.174   | 0.109     |
| <b>Yes</b> | 0.407   | 0.575    | 0.698     | 0.723    | 0.826   | 0.891     |

Source: Lung cancer symptoms at diagnosis: results of a nationwide registry study

**Table S4.** Mean progression time per cancer type and stage

| Mean progression time (treated)  | Months | Source                  |
|----------------------------------|--------|-------------------------|
| From NSCLC Stage I to Stage IIIA | 24.80  | Clinical expert opinion |

|                                          |       |                         |
|------------------------------------------|-------|-------------------------|
| From NSCLC Stage II to Stage IIIA        | 16.80 | Clinical expert opinion |
| From NSCLC Stage IIIA to Stage IV        | 11.67 | Clinical expert opinion |
| From NSCLC Stage IIIB to Stage IV        | 7.50  | Clinical expert opinion |
| From SCLC limited to extensive           | 9.00  | Clinical expert opinion |
| <b>Mean progression time (untreated)</b> |       |                         |
| From NSCLC Stage I to Stage IIIA         | 6.43  | Clinical expert opinion |
| From NSCLC Stage II to Stage IIIA        | 5.60  | Clinical expert opinion |
| From NSCLC Stage IIIA to Stage IV        | 6.00  | Clinical expert opinion |
| From NSCLC Stage IIIB to Stage IV        | 2.57  | Clinical expert opinion |
| From SCLC limited to extensive           | 2.43  | Clinical expert opinion |

**Table S5.** Transition probabilities for NSCLC stage I

| NSCLC- Stage I, 3-month interval           |        |                         |
|--------------------------------------------|--------|-------------------------|
| State                                      | Prob.  | Source                  |
| Treated patients (remain alive)            | 97.42% | Clinical expert opinion |
| Treated patients (die)                     | 0.30%  | Clinical expert opinion |
| Treated patients (Progress to Stage III)   | 1.49%  | Clinical expert opinion |
| Treated patients (Progress to Stage IV)    | 0.79%  | Clinical expert opinion |
| Untreated patients (remain alive)          | 74.83% | Clinical expert opinion |
| Untreated patients (die)                   | 1.00%  | Clinical expert opinion |
| Untreated patients (Progress to Stage III) | 18.14% | Clinical expert opinion |
| Untreated patients (Progress to Stage IV)  | 6.03%  | Clinical expert opinion |

**Table S6.** Transition probabilities for NSCLC stage II

| NSCLC- Stage II, 3-month interval        |        |                         |
|------------------------------------------|--------|-------------------------|
| State                                    | Prob.  | Source                  |
| Treated patients (remain alive)          | 87.67% | Clinical expert opinion |
| Treated patients (die)                   | 2.50%  | Clinical expert opinion |
| Treated patients (Progress to Stage III) | 4.11%  | Clinical expert opinion |
| Treated patients (Progress to Stage IV)  | 5.72%  | Clinical expert opinion |
| Untreated patients (remain alive)        | 62.87% | Clinical expert opinion |
| Untreated patients (die)                 | 2.56%  | Clinical expert opinion |

|                                            |        |                         |
|--------------------------------------------|--------|-------------------------|
| Untreated patients (Progress to Stage III) | 22.92% | Clinical expert opinion |
| Untreated patients (Progress to Stage IV)  | 11.65% | Clinical expert opinion |

**Table S7.** Transition probabilities for NSCLC stage IIIA

| NSCLC- Stage IIIA, 3-month interval        |        |                         |
|--------------------------------------------|--------|-------------------------|
| State                                      | Prob.  | Source                  |
| Treated patients (remain alive)            | 62.84% | Clinical expert opinion |
| Treated patients (die)                     | 4.90%  | Clinical expert opinion |
| Treated patients (Progress to Stage IV)    | 12.23% | Clinical expert opinion |
| Treated patients (Downstage to Stage II)   | 20.03% | Clinical expert opinion |
| Untreated patients (remain alive)          | 49.10% | Clinical expert opinion |
| Untreated patients (die)                   | 12.50% | Clinical expert opinion |
| Untreated patients (Progress to Stage IV)  | 37.20% | Clinical expert opinion |
| Untreated patients (Downstage to Stage II) | 1.20%  | Clinical expert opinion |

**Table S8.** Transition probabilities for NSCLC stage IIIB

| NSCLC- Stage IIIB, 3-month interval        |        |                         |
|--------------------------------------------|--------|-------------------------|
| State                                      | Prob.  | Source                  |
| Treated patients (remain alive)            | 56.8%  | Clinical expert opinion |
| Treated patients (die)                     | 8.80%  | Clinical expert opinion |
| Treated patients (Progress to Stage IV)    | 17.30% | Clinical expert opinion |
| Treated patients (Downstage to Stage II)   | 17.20% | Clinical expert opinion |
| Untreated patients (remain alive)          | 34.30% | Clinical expert opinion |
| Untreated patients (die)                   | 24.50% | Clinical expert opinion |
| Untreated patients (Progress to Stage IV)  | 41.20% | Clinical expert opinion |
| Untreated patients (Downstage to Stage II) | 0.00%  | Clinical expert opinion |

**Table S9.** Transition probabilities for NSCLC stage IV

| NSCLC- Stage IV, 3-month interval |        |                         |
|-----------------------------------|--------|-------------------------|
| State                             | Prob.  | Source                  |
| Treated patients (remain alive)   | 83.50% | Clinical expert opinion |

|                                   |        |                         |
|-----------------------------------|--------|-------------------------|
| Treated patients (die)            | 16.50% | Clinical expert opinion |
| Untreated patients (remain alive) | 56.00% | Clinical expert opinion |
| Untreated patients (die)          | 44.00% | Clinical expert opinion |

**Table S10.** Transition probabilities for SCLC limited stage

| SCLC-limited, 3-month interval                   |        |                         |
|--------------------------------------------------|--------|-------------------------|
| State                                            | Prob.  | Source                  |
| Treated patients (remain alive)                  | 76.42% | Clinical expert opinion |
| Treated patients (die)                           | 8.20%  | Clinical expert opinion |
| Treated patients (Progress to Extensive Stage)   | 15.39% | Clinical expert opinion |
| Untreated patients (remain alive)                | 37.70% | Clinical expert opinion |
| Untreated patients (die)                         | 33.50% | Clinical expert opinion |
| Untreated patients (Progress to Extensive Stage) | 28.80% | Clinical expert opinion |

**Table S11.** Transition probabilities for SCLC extensive stage

| SCLC- extensive, 3-month interval |        |                         |
|-----------------------------------|--------|-------------------------|
| State                             | Prob.  | Source                  |
| Treated patients (remain alive)   | 82.00% | Clinical expert opinion |
| Treated patients (die)            | 18.00% | Clinical expert opinion |
| Untreated patients (remain alive) | 28.00% | Clinical expert opinion |
| Untreated patients (die)          | 72.00% | Clinical expert opinion |

**Table S12.** Health state distribution in the hypothetical scenario (100% screening)

| Health state distribution |         | Source                                                                            |
|---------------------------|---------|-----------------------------------------------------------------------------------|
| Healthy                   | 0.99612 | Own calculation based on Globocan 2020 and Greek statistics on smoking population |
| Patient                   | 0.00388 |                                                                                   |
| NSCLC- Stage 0            | 2.80%   | Clinical expert opinion                                                           |
| NSCLC- Stage I            | 16.20%  | Clinical expert opinion                                                           |
| NSCLC- Stage II           | 18.50%  | Clinical expert opinion                                                           |

|                             |        |                         |
|-----------------------------|--------|-------------------------|
| NSCLC- Stage III operable   | 15.70% | Clinical expert opinion |
| NSCLC- Stage III inoperable | 15.50% | Clinical expert opinion |
| NSCLC- Stage IV             | 18.20% | Clinical expert opinion |
| SCLC – limited stage        | 4.90%  | Clinical expert opinion |
| SCLC – extensive stage      | 8.20%  | Clinical expert opinion |
